# Supplementary material for: W-doped VO2 for high-performance aqueous Zn-ion batteries
Source: Royal Society of Chemistry journal article supplement (doi:10.1039/d3cp03006g), 2023-01-01
Supplement: d3cp03006g1.pdf [file d3cp03006g1.pdf]

## Supporting Information

### **W doped VO<sub>2</sub> for high-performance aqueous Zn-ion batteries**

Guangxu Yang<sup>a</sup>, Shuhua Yang<sup>a,\*</sup>, Jinfeng Sun<sup>a</sup>, Guangbin Duan<sup>a,\*</sup>, Bingqiang Cao<sup>a</sup>,

Zongming Liu<sup>a,\*</sup>

<sup>a</sup> School of Material Science and Engineering, University of Jinan, Jinan 250022, China

\*Corresponding author:

E-mail: [yangshuhua78@163.com](mailto:yangshuhua78@163.com) (Shuhua Yang)

[mse\\_duangb@ujn.edu.cn](mailto:mse_duangb@ujn.edu.cn) (Guangbin Duan)

[ost\\_liuzm@ujn.edu.cn](mailto:ost_liuzm@ujn.edu.cn) (ZongMing Liu)

## Supporting Figures

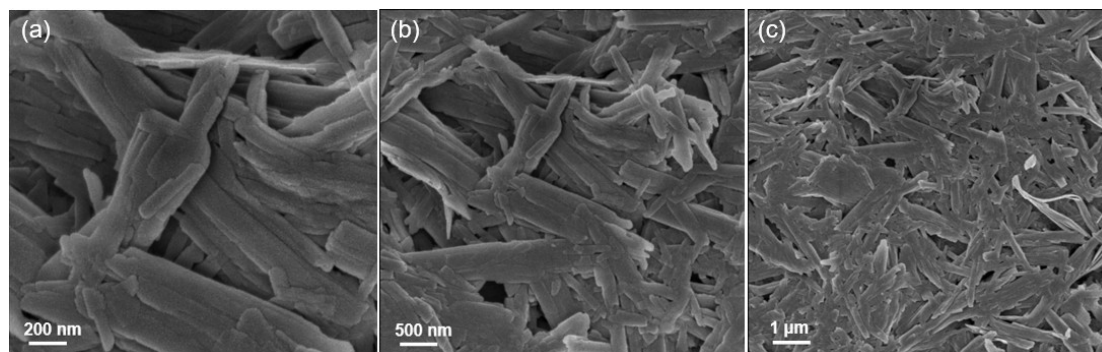

**Figure S1.** (a-c) SEM images of pureVO<sub>2</sub>.

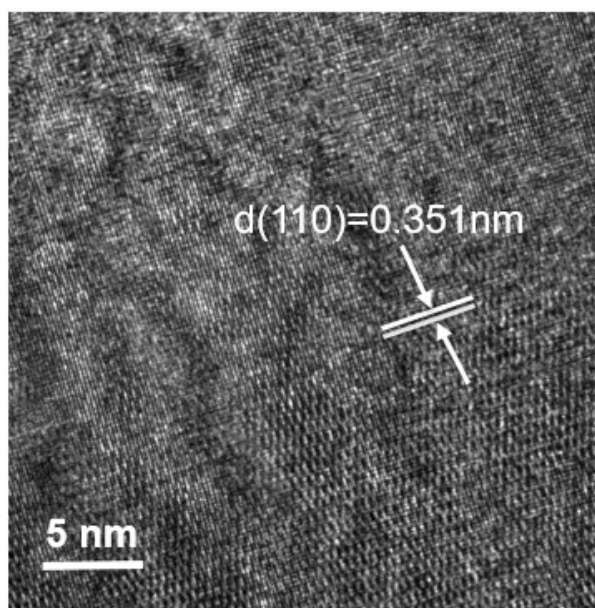

**Figure S2.** HRTEM image of pure VO<sub>2</sub> sample.

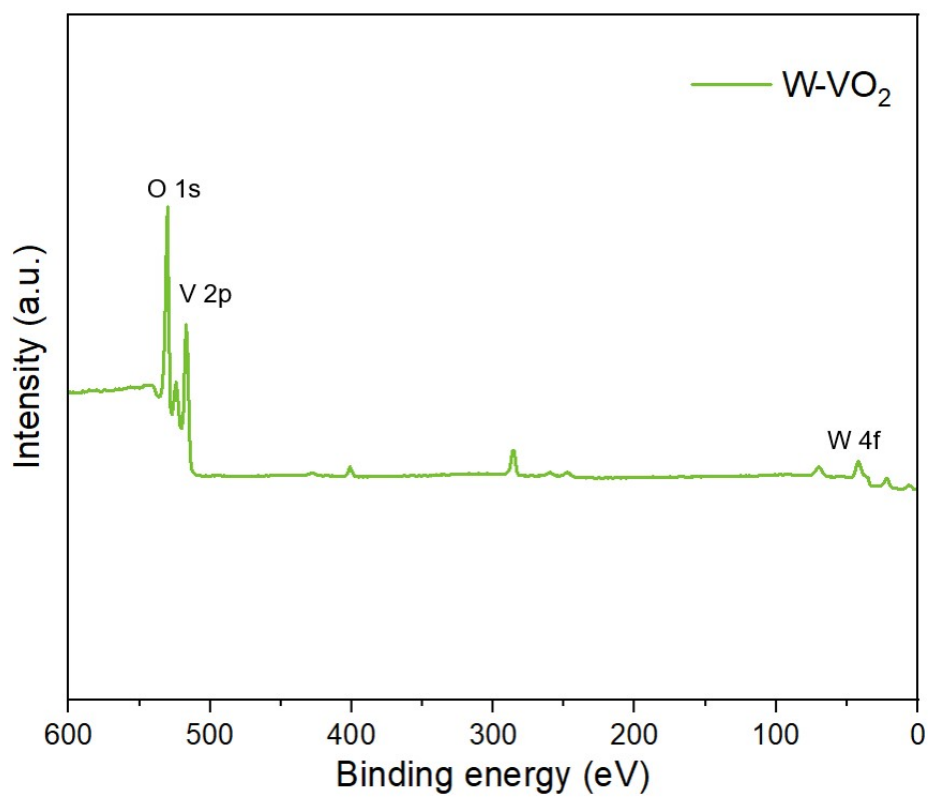

**Figure S3.** XPS survey spectrum of W-VO<sub>2</sub>.

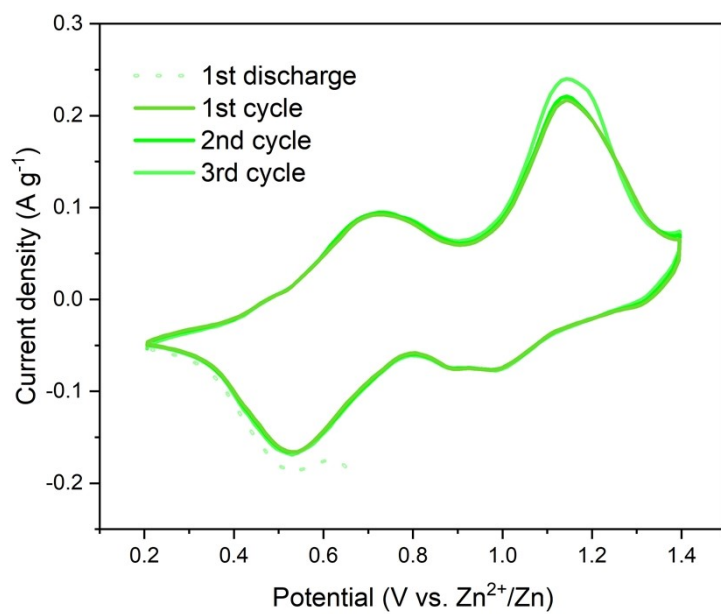

**Figure S4.** CV curves of the first 3 cycles at 0.2 mV s<sup>-1</sup> (W-VO<sub>2</sub>).

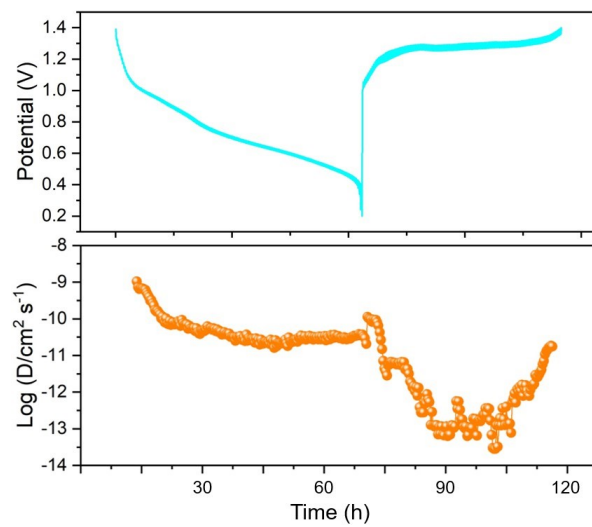

**Figure S5.** GITT curve and the corresponding  $\text{Zn}^{2+}$  diffusion coefficient of pure  $\text{VO}_2$  electrode.
